# Supplementary material for: Combined Association of Body Mass Index and Alcohol Consumption With Biomarkers for Liver Injury and Incidence of Liver Disease: A Mendelian Randomization Study
Source: PubMed Central journal article supplement (PMC6484655; doi:10.1001/jamanetworkopen.2019.0305), 2019-03-08

## Supplementary Online Content

Carter AR, Borges M-C, Benn M, et al. Combined association of body mass index and alcohol consumption with biomarkers for liver injury and incidence of liver disease: a mendelian randomization study. *JAMA Netw Open*. 2019;2(3):e190305.  
doi:10.1001/jamanetworkopen.2019.0305

**eTable 1.** ICD Codes Used for Clinical Diagnosis of Liver Disease

**eTable 2.** Baseline Characteristics of All Exposure, Outcomes and Confounding Variables Amongst All Participants

**eTable 3.** Distributions of Males and Females Across Observational and Genetic Factorial Groups

**eTable 4.** Univariable Associations Between Body Mass Index (BMI) and Alcohol and Potential Confounders

**eTable 5.** Univariable Associations Between the Weighted Allele Score for Body Mass Index (BMI) and the *ADH1B* Allele for Alcohol and Potential Confounders

**eTable 6.** Univariable Associations via Multinomial Logistic Regression Between Exposures and Potential Confounders With Observational and Genetic Factorial Groups

**eTable 7.** Allele Frequencies and Test for Hardy-Weinberg Equilibrium (HWE) for Each Genetic Variant

**eTable 8.** Associations of Body Mass Index (BMI) and Alcohol Genetic Instruments With the Relevant Risk Factors

**eTable 9.** MR Egger and Weighted Median Regression of the Association Between BMI and Each Liver Disease Amongst All Participants With Cases of Prevalent Liver Disease Excluded

**eFigure 1.** Multivariable and Mendelian Randomization Individual Analysis of Body Mass Index (BMI) and Alcohol on Liver Disease Biomarkers Including All Individuals With Previously Diagnosed (Prevalent) Liver Disease

**eFigure 2.** Multivariable and Mendelian Randomization Individual Analysis of Body Mass Index (BMI) and Alcohol on Liver Disease Including All Cases of Liver Disease

**eFigure 3.** Multivariable Regression Associations of Measured Categories of Body Mass Index (BMI) With Biomarkers of Liver Injury and Incident Liver Disease

**eFigure 4.** Multivariable Regression Associations of Alanine Amino Transferase (ALT),  $\Gamma$ -Glutamyltransferase (GGT), and Incident Liver Disease With Categories of Weekly Alcohol Consumption

**eFigure 5.** Multivariable and Mendelian Randomization Factorial Analysis of the Joint Effects of Body Mass Index (BMI) and Alcohol on Biomarkers of Liver Injury, Including All Individuals With Previously Diagnosed (Prevalent) Liver Disease

**eFigure 6.** Multivariable and Mendelian Randomization Factorial Analysis of the Joint Effects of BMI and Alcohol on Liver Disease, Including All Individuals With Previously Diagnosed (Prevalent) Liver Disease

**eFigure 7.** Multivariable and Mendelian Randomization Analysis of Body Mass Index (BMI) and Liver Injury Biomarkers and Incident Cases of Liver Disease, Stratified by Self-Reported Alcohol Consumption

**eFigure 8.** “Leave One Out” Analysis to Assess for Heterogeneity Between BMI Genetic Variants and Liver Injury Biomarkers and Incident Cases of Liver Disease

This supplementary material has been provided by the authors to give readers additional information about their work.

**eTable 1. ICD Codes Used for Clinical Diagnosis of Liver Disease**

|                                                                             | ICD 8         | ICD10        |
|-----------------------------------------------------------------------------|---------------|--------------|
| Chronic liver disease and cirrhosis                                         | 571.00-571.7  | K70.0-K70.9  |
| Other and Unspecified chronic liver disease without mention of alcohol      | 571.8, 571.9  | K74.6, K75.8 |
| Hepatic fibrosis                                                            |               | K74.0        |
| Malignant neoplasms of the liver and other malignancies                     | 155.09-155.89 | C22, R18     |
| Acute and subacute necrosis of the liver                                    | 570.00-570.99 |              |
| Chronic passive congestion of the liver – unspecified disorder of the liver | 573.00-573.9  | K75.9        |
| Abdominal swelling                                                          | 785.19-785.39 |              |
| Other disease of the liver                                                  |               | K76.0, K76.9 |

**eTable 2. Baseline Characteristics of All Exposure, Outcomes and Confounding Variables Amongst All Participants**

| Characteristic             | All Participants [%] | Female [%]     | Male [%]       |
|----------------------------|----------------------|----------------|----------------|
| Sex                        | 98 643               |                |                |
| Male                       | 44 344 [55.05]       |                |                |
| Female                     | 54 299 [44.95]       |                |                |
| Age years                  | 98 643               | 54 299         | 44 344         |
| 20-25                      | 796 [0.81]           | 458 [0.84]     | 338 [0.76]     |
| 26-30                      | 1020 [1.03]          | 554 [1.02]     | 466 [1.05]     |
| 31-35                      | 1822 [1.85]          | 1055 [1.94]    | 767 [1.73]     |
| 36-40                      | 3096 [3.14]          | 1803 [3.32]    | 1293 [2.92]    |
| 41-45                      | 10 177 [10.32]       | 5866 [10.80]   | 4311 [9.72]    |
| 46-50                      | 12 564 [12.74]       | 7102 [13.08]   | 5462 [12.32]   |
| 51-55                      | 12 324 [12.49]       | 6732 [12.40]   | 5592 [12.61]   |
| 56-60                      | 12 428 [12.60]       | 6924 [12.75]   | 5504 [12.41]   |
| 61-65                      | 13 844 [14.03]       | 7639 [14.07]   | 6205 [13.99]   |
| 66-70                      | 11 956 [12.12]       | 6452 [11.88]   | 5504 [12.41]   |
| 71-75                      | 8547 [8.66]          | 4485 [8.26]    | 4062 [9.16]    |
| 76-80                      | 5534 [5.61]          | 2868 [5.28]    | 2666 [6.01]    |
| >81                        | 4535 [4.60]          | 2361 [4.35]    | 2174 [4.90]    |
| BMI                        | 98 307               | 54 031         | 44 276         |
| Underweight                | 696 [0.71]           | 598 [1.11]     | 98 [0.22]      |
| Normal                     | 42 140 [42.87]       | 27 656 [51.19] | 14 484 [32.71] |
| Overweight                 | 39 474 [40.15]       | 17 483 [32.36] | 21 991 [49.67] |
| Obese                      | 15 997 [16.27]       | 8294 [15.35]   | 7703 [17.40]   |
| Weekly Alcohol Consumption | 98 579               | 54 260         | 44 319         |
| None                       | 9308 [9.44]          | 6745 [12.43]   | 2563 [5.78]    |
| 1-7 Units                  | 38 093 [38.64]       | 25 347 [46.71] | 12 746 [28.76] |
| 8-14 Units                 | 25 570 [25.94]       | 13 814 [25.46] | 11 756 [26.53] |
| 15-21 Units                | 13 517 [13.71]       | 5592 [10.31]   | 7925 [17.88]   |
| 22-34 Units                | 9105 [9.24]          | 2342 [4.32]    | 6763 [15.26]   |
| >35 Units                  | 2986 [3.03]          | 420 [0.77]     | 2566 [5.79]    |
| Liver Disease              | 98 643               | 54 299         | 44 344         |
| None                       | 97 238 [98.58]       | 53 570 [98.78] | 43 668 [98.48] |
| All Cases                  | 1405 [1.42]          | 729 [1.34]     | 676 [1.52]     |
| Removing Prevalent cases   | 626 [0.63]           | 325 [0.60]     | 301 [0.68]     |
| Education                  | 98 312               | 54 119         | 44 193         |
| <10 years                  | 25 275 [25.71]       | 13 134 [24.27] | 12 141 [27.47] |
| 10-13 years                | 54 937 [55.88]       | 30 871 [57.04] | 24 066 [54.46] |
| >13 years                  | 18 100 [18.41]       | 10 114 [18.69] | 7986 [18.07]   |
| Smoking                    | 98 038               | 54 132         | 43 906         |
| Never Smoker               | 41 674 [42.51]       | 24 472 [45.21] | 17 202 [39.18] |
| Former Smoker              | 39 061 [39.84]       | 20 514 [37.90] | 18 547 [42.24] |
| Current Smoker             | 17 303 [17.65]       | 9146 [16.90]   | 8157 [18.58]   |

|                                                     |                |                |                |
|-----------------------------------------------------|----------------|----------------|----------------|
| Income                                              | 97 379         | 53 391         | 43 988         |
| <100.000kr                                          | 1506 [1.55]    | 973 [1.82]     | 533 [1.21]     |
| 100.000 – 400.000kr                                 | 34 225 [35.15] | 20 894 [39.13] | 13 331 [30.31] |
| 400.000-600.000kr                                   | 38 150 [39.18] | 19 806 [37.10] | 18 344 [41.70] |
| >600.000kr                                          | 23 498 [24.13] | 11 718 [21.95] | 11 780 [26.78] |
| Leisure Time Physical Activity                      | 97 828         | 53 777         | 44 051         |
| <2 hours per week                                   | 6233 [6.4]     | 3310 [6.16]    | 2923 [6.64]    |
| 2-4 hours per week                                  | 41 777 [42.7]  | 25 209 [46.88] | 16 568 [37.61] |
| Moderate >4 hours per week/Heavy 2-4 hours per week | 43 416 [44.4]  | 23 197 [43.14] | 20 219 [45.90] |
| >4 hours heavy activity                             | 6402 [6.5]     | 2061 [3.83]    | 4341 [9.85]    |
| <i>FTO</i>                                          | 96 770         | 53 225         | 43 545         |
| Homozygous [decreasing]                             | 34 431 [35.58] | 19 010 [35.72] | 15 421 [35.41] |
| Heterozygous                                        | 46 869 [48.43] | 25 691 [48.27] | 21 178 [48.63] |
| Homozygous [increasing]                             | 15 470 [15.99] | 8524 [16.02]   | 6946 [15.95]   |
| <i>TMEM18</i>                                       | 97 443         | 53 598         | 43 845         |
| Homozygous [decreasing]                             | 2712 [2.78]    | 1481 [2.76]    | 1231 [2.81]    |
| Heterozygous                                        | 27 438 [28.16] | 15 128 [28.22] | 12 310 [28.08] |
| Homozygous [increasing]                             | 67 293 [69.06] | 36 989 [69.01] | 30 304 [69.12] |
| <i>MC4R</i>                                         | 97 465         | 53 608         | 43 857         |
| Homozygous [decreasing]                             | 55 165 [56.60] | 30 297 [56.52] | 24 868 [56.70] |
| Heterozygous                                        | 36 325 [37.27] | 20 002 [37.31] | 16 323 [37.22] |
| Homozygous [increasing]                             | 5975 [6.13]    | 3309 [6.17]    | 2666 [6.08]    |
| <i>BDNF</i>                                         | 97 530         | 53 633         | 43 897         |
| Homozygous [decreasing]                             | 5163 [5.29]    | 2795 [5.21]    | 2368 [5.39]    |
| Heterozygous                                        | 34 495 [35.37] | 18 888 [35.22] | 15 607 [35.55] |
| Homozygous [increasing]                             | 57 872 [59.34] | 31 950 [59.57] | 25 992 [59.05] |
| <i>GNPDA2</i>                                       | 97 904         | 53 850         | 44 054         |
| Homozygous [decreasing]                             | 34 508 [35.25] | 19 052 [35.38] | 15 456 [35.08] |
| Heterozygous                                        | 47 323 [48.34] | 25 995 [48.27] | 21 328 [48.41] |
| Homozygous [increasing]                             | 16 073 [16.42] | 8803 [16.35]   | 770 [16.50]    |
| <i>ADH1B</i>                                        | 97 925         | 53 869         | 44 056         |
| Homozygous [Alcohol decreasing]                     | 43 [0.04]      | 22 [0.04]      | 21 [0.05]      |
| Heterozygous                                        | 3966 [4.05]    | 2131 [3.96]    | 1835 [4.17]    |
| Homozygous [Alcohol Increasing]                     | 93 916 [95.91] | 51 716 [16.50] | 42 200 [95.79] |

**eTable 3. Distributions of Males and Females Across Observational and Genetic Factorial Groups**

|               |        | Low BMI & Low Alcohol [%] | Low BMI & High Alcohol [%] | High BMI & Low Alcohol [%] | High BMI & High Alcohol [%] |
|---------------|--------|---------------------------|----------------------------|----------------------------|-----------------------------|
| Observational | Female | 15 830 [31.33]            | 10 185 [20.16]             | 16 590 [32.84]             | 7918[15.67]                 |
|               | Male   | 7843 [18.79]              | 12 384 [29.68]             | 8367 [20.05]               | 13 138 [31.48]              |
| Genetic       | Female | 1045 [2.07]               | 24 583 [48.66]             | 986 [1.95]                 | 23 909 [47.32]              |
|               | Male   | 884 [2.12]                | 20 367 [48.80]             | 862 [2.07]                 | 19 619 [47.01]              |

**eTable 4. Univariable Associations Between Body Mass Index (BMI) and Alcohol and Potential Confounders.**

| Covariate              | Mean difference in measured BMI (95% CI) | Mean difference in self-reported weekly alcohol consumption (95% CI) | Odds ratio of incident liver disease (95% CI) |
|------------------------|------------------------------------------|----------------------------------------------------------------------|-----------------------------------------------|
| Age years              |                                          |                                                                      |                                               |
| <30                    | Reference                                | Reference                                                            | Reference                                     |
| 30-39                  | 0.74 (0.51, 0.98)                        | -0.80 (-1.36, -0.24)                                                 | 5.06 (1.20, 21.28)                            |
| 40-49                  | 1.30 (1.09, 1.52)                        | 1.86 (1.36, 2.35)                                                    | 7.05 (1.75, 28.44)                            |
| 50-59                  | 1.89 (1.68, 2.10)                        | 4.82 (4.32, 5.31)                                                    | 11.86 (2.95, 47.66)                           |
| 60-69                  | 2.26 (2.05, 2.47)                        | 6.20 (5.70, 6.70)                                                    | 15.52 (3.86, 62.29)                           |
| 70-79                  | 2.28 (1.33, 1.81)                        | 5.31 (4.80, 5.82)                                                    | 14.54 (3.61, 58.57)                           |
| 80+                    | 1.57 (1.33, 1.81)                        | 3.97 (3.40, 4.54)                                                    | 17.28 (4.23, 70.12)                           |
|                        |                                          |                                                                      |                                               |
| Sex                    |                                          |                                                                      |                                               |
| Female                 | Reference                                | Reference                                                            | Reference                                     |
| Male                   | 1.21 (1.16, 1.27)                        | 6.23 (6.10, 6.36)                                                    | 1.17 (1.00, 1.38)                             |
|                        |                                          |                                                                      |                                               |
| Education              |                                          |                                                                      |                                               |
| <10 years              | Reference                                | Reference                                                            | Reference                                     |
| 10-13 years            | -1.37 (-1.43, -1.30)                     | -0.12 (-0.28, 0.03)                                                  | 0.46 (0.38, 0.55)                             |
| >13 years              | -1.79 (-1.88, -1.71)                     | -1.55 (-1.75, -1.35)                                                 | 0.41 (0.31, 0.53)                             |
|                        |                                          |                                                                      |                                               |
| Smoking                |                                          |                                                                      |                                               |
| Never                  | Reference                                | Reference                                                            | Reference                                     |
| Ever                   | 0.36 (0.30, 0.41)                        | 2.90 (2.77, 3.03)                                                    | 1.68 (1.40, 2.00)                             |
|                        |                                          |                                                                      |                                               |
| Income                 |                                          |                                                                      |                                               |
| <100.000 kr            | Reference                                | Reference                                                            | Reference                                     |
| 100.000kr – 400.000kr  | 0.17 (-0.06, 0.40)                       | 1.99 (1.44, 2.55)                                                    | 0.88 (0.52, 1.48)                             |
| 400.000kr – 600.000 kr | -0.30 (-0.52, -0.06)                     | 2.52 (1.96, 3.07)                                                    | 0.44 (0.26, 0.74)                             |
| >600.000 kr            | -1.08 (-1.31, -0.85)                     | 2.57 (2.01, 3.13)                                                    | 0.31 (0.18, 0.55)                             |
|                        |                                          |                                                                      |                                               |
| Physical Activity      |                                          |                                                                      |                                               |
| 0-4 hours weekly       | Reference                                | Reference                                                            | Reference                                     |
| >4 hours weekly        | -1.21 (-1.27, -1.16)                     | 0.71 (0.58, 0.84)                                                    | 0.70 (0.60, 0.83)                             |

**eTable 5. Univariable associations between the weighted allele score for body mass index (BMI) and the *ADH1B* allele for alcohol and potential confounders**

| Covariate                         | Mean difference increase in BMI according to BMI genotype (95% CI) | Mean difference in weekly alcohol consumption according to alcohol genotype (95% CI) |
|-----------------------------------|--------------------------------------------------------------------|--------------------------------------------------------------------------------------|
| <b>BMI</b>                        |                                                                    |                                                                                      |
| Normal/Underweight                | Reference                                                          | Reference                                                                            |
| Overweight                        | 0.006 (0.005, 0.007)                                               | 0.002 (-0.001, 0.005)                                                                |
| Obese                             | 0.014 (0.013, 0.016)                                               | 0.006 (0.002, 0.009)                                                                 |
|                                   |                                                                    |                                                                                      |
| <b>Weekly alcohol consumption</b> |                                                                    |                                                                                      |
| 0 units                           | Reference                                                          | Reference                                                                            |
| 1-14 units                        | -0.002 (-0.003, 0.0002)                                            | 0.014 (0.009, 0.018)                                                                 |
| >15 units                         | -0.001 (-0.003, 0.0007)                                            | 0.024 (0.019, 0.029)                                                                 |
|                                   |                                                                    |                                                                                      |
| <b>Age years</b>                  |                                                                    |                                                                                      |
| <30                               | Reference                                                          | Reference                                                                            |
| 30-39                             | .0002 (-0.004, 0.005)                                              | -0.010 (-0.021, 0.002)                                                               |
| 40-49                             | -0.003 (-0.007, 0.001)                                             | -0.013 (-0.023, -0.003)                                                              |
| 50-59                             | -0.003 (-0.007, 0.001)                                             | -0.013 (-0.023, -0.023)                                                              |
| 60-69                             | -0.002 (-0.006, 0.002)                                             | -0.010 (-0.020, -0.00003)                                                            |
| 70-79                             | -0.002 (-0.006, 0.002)                                             | -0.014 (-0.025, -0.004)                                                              |
| 80+                               | -0.003 (-0.007, 0.002)                                             | -0.014 (-0.025, -0.002)                                                              |
|                                   |                                                                    |                                                                                      |
| <b>Sex</b>                        |                                                                    |                                                                                      |
| Female                            | Reference                                                          | Reference                                                                            |
| Male                              | -.00003 (-0.001, 0.001)                                            | -0.002 (-0.004, 0.001)                                                               |
|                                   |                                                                    |                                                                                      |
| <b>Education</b>                  |                                                                    |                                                                                      |
| <10 years                         | Reference                                                          | Reference                                                                            |
| 10-13 years                       | -0.001 (-0.002, 0.00004)                                           | -0.003 (-0.006, 0.001)                                                               |
| >13 years                         | -0.0004 (-0.002, 0.001)                                            | -0.003 (-0.007, 0.001)                                                               |
|                                   |                                                                    |                                                                                      |
| <b>Smoking</b>                    |                                                                    |                                                                                      |
| Never                             | Reference                                                          | Reference                                                                            |
| Ever                              | 0.002 (0.0006, 0.003)                                              | -0.003 (-0.005, -0.0001)                                                             |
|                                   |                                                                    |                                                                                      |
| <b>Income</b>                     |                                                                    |                                                                                      |
| <100.000 kr                       | Reference                                                          | Reference                                                                            |
| 100.000kr – 400.000kr             | -0.003 (-0.007, 0.002)                                             | -0.010 (-0.021, 0.001)                                                               |
| 400.000kr – 600.000 kr            | -0.003 (-0.007, 0.001)                                             | -0.010 (-0.021, 0.001)                                                               |
| >600.000 kr                       | -0.005 (-0.010, -0.001)                                            | -0.10 (-0.021, 0.001)                                                                |
|                                   |                                                                    |                                                                                      |
| <b>Physical Activity</b>          |                                                                    |                                                                                      |
| 0-4 hours weekly                  | Reference                                                          | Reference                                                                            |
| >4 hours weekly                   | 0.001 (-0.001, 0.002)                                              | -0.002 (-0.005, 0.001)                                                               |

**eTable 6. Univariable Associations via Multinomial Logistic Regression Between Exposures and Potential Confounders With Observational and Genetic Factorial Groups**

| Covariate                  | Log odds ratio for observational factorial groups (95% CI) |                        |                        |                         | Log odds ratio for genetic factorial groups (95% CI) |                        |                        |                         |
|----------------------------|------------------------------------------------------------|------------------------|------------------------|-------------------------|------------------------------------------------------|------------------------|------------------------|-------------------------|
|                            | Low BMI & Low Alcohol                                      | Low BMI & High Alcohol | High BMI & Low Alcohol | High BMI & High Alcohol | Low BMI & Low Alcohol                                | Low BMI & High Alcohol | High BMI & Low Alcohol | High BMI & High Alcohol |
| BMI                        | Reference                                                  | 0.67 (0.61, 0.72)      | 4.99 (4.93, 5.06)      | 4.95 (4.88, 5.01)       | Reference                                            | 0.07 (0.0001, 0.13)    | 0.15 (0.06, 0.24)      | 0.21 (0.15, 0.28)       |
| Weekly alcohol consumption | Reference                                                  | 8.58 (7.89, 9.27)      | -0.31 (-0.36, -0.27)   | 8.71 (8.02, 9.40)       | Reference                                            | 0.26 (0.18, 0.34)      | -0.06 (-0.17, 0.06)    | 0.26 (0.18, 0.34)       |
| Age years                  |                                                            |                        |                        |                         |                                                      |                        |                        |                         |
| <30                        | Reference                                                  |                        |                        |                         | Reference                                            |                        |                        |                         |
| 30-39                      |                                                            | -0.37 (-0.55, -0.19)   | -0.03 (-0.16, 0.10)    | -0.33 (-0.51, -0.15)    |                                                      | -0.22 (-0.67, 0.22)    | 0.17 (-0.47 0.80)      | -0.17 (-0.62, 0.28)     |
| 40-49                      |                                                            | 0.44 (0.28, 0.59)      | 0.05 (-0.07, 0.17)     | 0.39 (0.23, 0.55)       |                                                      | -0.38 (-0.78, 0.19)    | -0.004 (-0.58, 0.57)   | -0.37 (-0.77, 0.04)     |
| 50-59                      |                                                            | 1.09 (0.94, 1.25)      | 0.11 (-0.004, 0.23)    | 1.06 (0.90, 1.21)       |                                                      | -0.29 (-0.69, 0.11)    | 0.14 (-0.44, 0.71)     | -0.29 (-0.69, 0.11)     |
| 60-69                      |                                                            | 1.36 (1.21, 1.52)      | 0.20 (0.08, 0.32)      | 1.39 (1.23, 1.55)       |                                                      | -0.28 (-0.69, 0.11)    | 0.06 (-0.51, 0.64)     | -0.26 (-0.66, 0.15)     |
| 70-79                      |                                                            | 1.27 (1.11, 1.43)      | 0.24 (0.11, 0.36)      | 1.30 (1.13, 1.46)       |                                                      | -0.35 (-0.76, 0.06)    | 0.14 (-0.45, 0.71)     | -0.31 (-0.72, 0.10)     |
| 80+                        |                                                            | 0.91 (0.74, 1.09)      | 0.18 (0.04, 0.32)      | 1.07 (0.90, 1.25)       |                                                      | -0.38 (-0.82, 0.07)    | 0.05 (-0.58, 0.69)     | -0.35 (-0.80, 0.09)     |
|                            |                                                            |                        |                        |                         |                                                      |                        |                        |                         |



|                        |           |                      |                      |                      |           |                      |                     |                     |
|------------------------|-----------|----------------------|----------------------|----------------------|-----------|----------------------|---------------------|---------------------|
| Sex                    |           |                      |                      |                      |           |                      |                     |                     |
| Female                 | Reference |                      |                      |                      | Reference |                      |                     |                     |
| Male                   |           | 0.90 (0.86, 0.93)    | 0.02 (-0.02, 0.05)   | 1.21 (1.17, 1.25)    |           | -0.02 (-0.11, 0.07)  | 0.03 (-0.10, 0.16)  | -0.03 (-0.13, 0.06) |
| Education              |           |                      |                      |                      |           |                      |                     |                     |
| <10 years              | Reference |                      |                      |                      | Reference |                      |                     |                     |
| 10-13 years            |           | 0.01 (-0.04, 0.06)   | -0.46 (-0.50, -0.41) | -0.46 (-0.50, -0.41) |           | -0.07 (-0.19, 0.04)  | -0.04 (-0.20, 0.11) | -0.08 (-0.20, 0.03) |
| >13 years              |           | -0.32 (-0.38, -0.26) | -0.58 (-0.63, -0.52) | -0.81 (-0.87, -0.75) |           | -0.07 (-0.21, 0.07)  | -0.02 (-0.22, 0.17) | -0.07 (-0.21, 0.07) |
| Smoking                |           |                      |                      |                      |           |                      |                     |                     |
| Never                  | Reference |                      |                      |                      | Reference |                      |                     |                     |
| Ever                   |           | 0.52 (0.48, 0.55)    | 0.17 (0.13, 0.20)    | 0.60 (0.57, 0.64)    |           | -0.51 (-0.14, 0.04)0 | 0.08 (-0.05, 0.21)  | -0.02 (-0.11, 0.08) |
| Income                 |           |                      |                      |                      |           |                      |                     |                     |
| <100.000 kr            | Reference |                      |                      |                      | Reference |                      |                     |                     |
| 100.000kr – 400.000kr  |           | 0.41 (0.24, 0.58)    | -0.04 (-0.17, 0.10)  | 0.41 (0.24, 0.57)    |           | -0.15 (-0.55, 0.26)  | 0.20 (-0.41, 0.82)  | -0.19 (-0.60, 0.21) |
| 400.000kr – 600.000 kr |           | 0.51 (0.35, 0.68)    | -0.21 (-0.35, -0.07) | 0.41 (0.25, 0.57)    |           | -0.06 (-0.46, 0.35)  | 0.40 (-0.21, 1.01)  | -0.11 (-0.52, 0.30) |
| >600.000 kr            |           | 0.54 (0.37, 0.71)    | -0.55 (-0.69, -0.41) | 0.20 (0.03, 0.36)    |           | -0.12 (-0.53, 0.29)  | 0.23 (-0.39, 0.85)  | -0.20 (-0.61, 0.21) |
| Physical Activity      |           |                      |                      |                      |           |                      |                     |                     |
| 0-4 hours weekly       | Reference |                      |                      |                      | Reference |                      |                     |                     |
| >4 hours weekly        |           | 0.15 (0.11, 0.18)    | -0.50 (-0.54, -0.47) | -0.58 (-0.32, -0.24) |           | -0.004 (-0.10, 0.09) | 0.09 (-0.04, 0.21)  | -0.01 (-0.10, 0.08) |

BMI = Body Mass Index CI = Confidence Interval

**eTable 7. Allele Frequencies and Test for Hardy-Weinberg Equilibrium (HWE) for Each Genetic Variant**

| Genetic variant | Minor Allele Frequency | HWE P value |
|-----------------|------------------------|-------------|
| <i>FTO</i>      | 0.36                   | 0.06        |
| <i>TMEM18</i>   | 0.28                   | 0.17        |
| <i>MC4R</i>     | 0.37                   | 0.79        |
| <i>BDNF</i>     | 0.35                   | 0.98        |
| <i>GNPDA2</i>   | 0.35                   | 0.63        |
| <i>ADH1B</i>    | 0.04                   | 0.68        |

**eTable 8. Associations of Body Mass Index (BMI) and Alcohol Genetic Instruments With the Relevant Risk Factors (First-stage regression analyses relevant to instrument strength n=92 255)**

| Genetic Variant | Per risk allele increase in BMI SD (95% CI)                             | F statistic        | R-squared        |
|-----------------|-------------------------------------------------------------------------|--------------------|------------------|
| <i>FTO</i>      | 0.08 [0.07, 0.08]                                                       | 251                | 0.0027           |
| <i>TMEM18</i>   | 0.05 [0.03, 0.06]                                                       | 56                 | 0.0006           |
| <i>MC4R</i>     | 0.05 [0.04, 0.06]                                                       | 82                 | 0.0009           |
| <i>BDNF</i>     | 0.03 [0.02, 0.05]                                                       | 38                 | 0.0004           |
| <i>GNPDA2</i>   | 0.03 [0.02, 0.04]                                                       | 34                 | 0.0004           |
| Weighted Allele | 0.86 [0.78, 0.94]                                                       | 453                | 0.0049           |
|                 | <b>Per risk allele increase in alcohol consumption (units per week)</b> | <b>F statistic</b> | <b>R-squared</b> |
| <i>ADH1B</i>    | 1.81 [1.48, 2.14]                                                       | 117.4              | 0.0013           |

**eTable 9. MR Egger and Weighted Median Regression of the Association Between BMI and Each Liver Disease Amongst All Participants With Cases of Prevalent Liver Disease Excluded**

| MR Egger estimates in all participants |                                   |                                   |                           |
|----------------------------------------|-----------------------------------|-----------------------------------|---------------------------|
|                                        | ALT Difference in mean % [95% CI] | GGT Difference in mean % [95% CI] | Liver Disease OR [95% CI] |
| MR Egger estimate                      | 42.49 [10.21,74.78]               | 26.45 [-87.35,66.15]              | 1.23 [-6.79,9.24]         |
| MR Egger constant                      | -73.26 [-45.26, 1.28]             | -84.50 [-50.32,18.68]             | -0.59 [-7.63,9.24]        |
| Weighted Median                        | 11.95 [7.07,16.84]                | 9.04 [3.82,14.27]                 | 1.00 [0.99,1.01]          |

CI = confidence interval; OR = Odds ratio

**eFigure 1. Multivariable and Mendelian Randomization Individual Analysis of Body Mass Index (BMI) and Alcohol on Liver Disease Biomarkers Including All Individuals With Previously Diagnosed (Prevalent) Liver Disease**

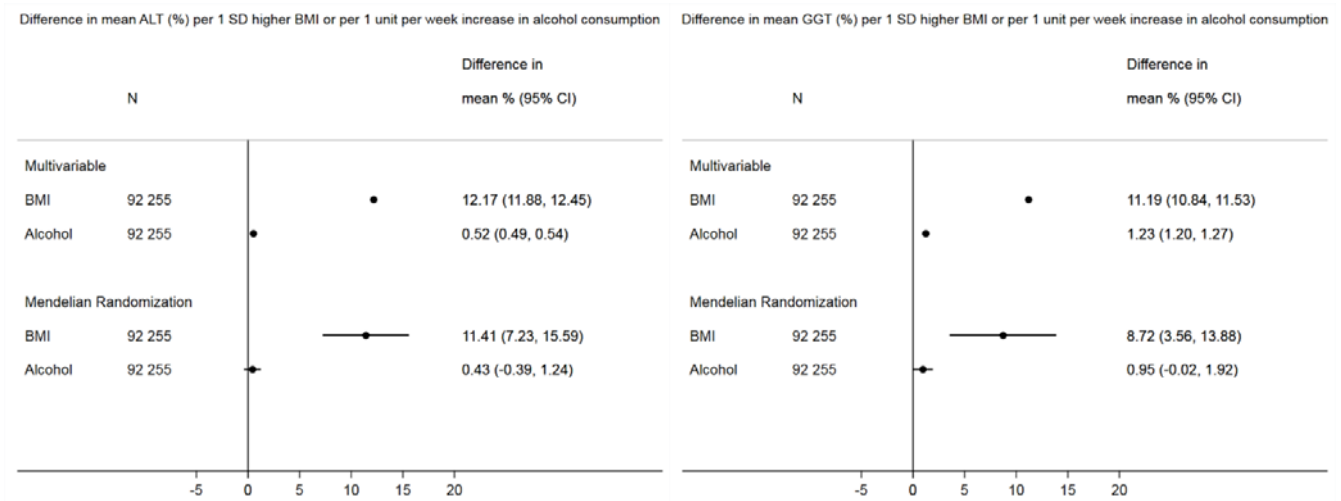

BMI measured as age and sex standardised units. Alcohol as units of alcohol consumed per week, where one unit is equivalent to 12g of alcohol. MV = Multivariable analysis, adjusted for Models adjusted for age, sex, smoking, education, income and physical activity. MR= Mendelian Randomization, using weighted allele score for BMI. CI = confidence interval.

**eFigure 2. Multivariable and Mendelian Randomization Individual Analysis of Body Mass Index (BMI) and Alcohol on Liver Disease Including All Cases of Liver Disease**

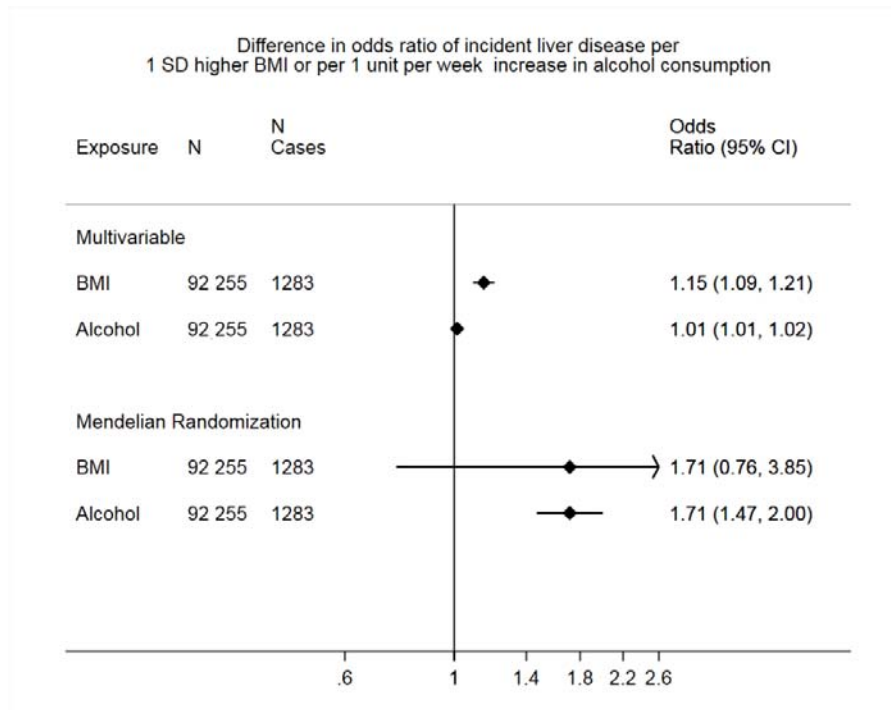

BMI measured as age and sex standardised units. Alcohol as units of alcohol consumed per week, where one unit is equivalent to 12g of alcohol. MV = Multivariable analysis, adjusted for Models adjusted for age, sex, smoking, education, income and physical activity. MR= Mendelian Randomization, using weighted allele score for BMI. CI = confidence interval.

**eFigure 3. Multivariable Regression Associations of Measured Categories of Body Mass Index (BMI) With Biomarkers of Liver Injury and Incident Liver Disease**

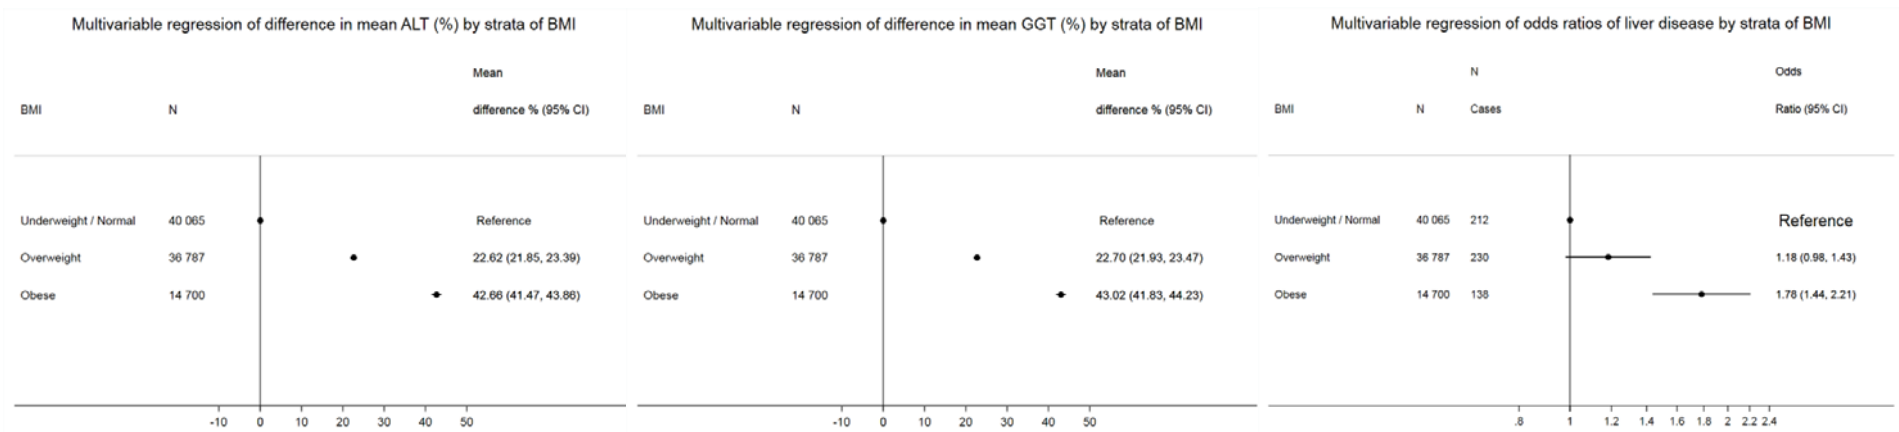

Models adjusted for age, sex, smoking, education, income and physical activity. CI = confidence

**eFigure 4. Multivariable Regression Associations of Alanine Amino Transferase (ALT) (A),  $\Gamma$ -Glutamyltransferase (GGT) (B), and Incident Liver Disease (C) With Categories of Weekly Alcohol Consumption**

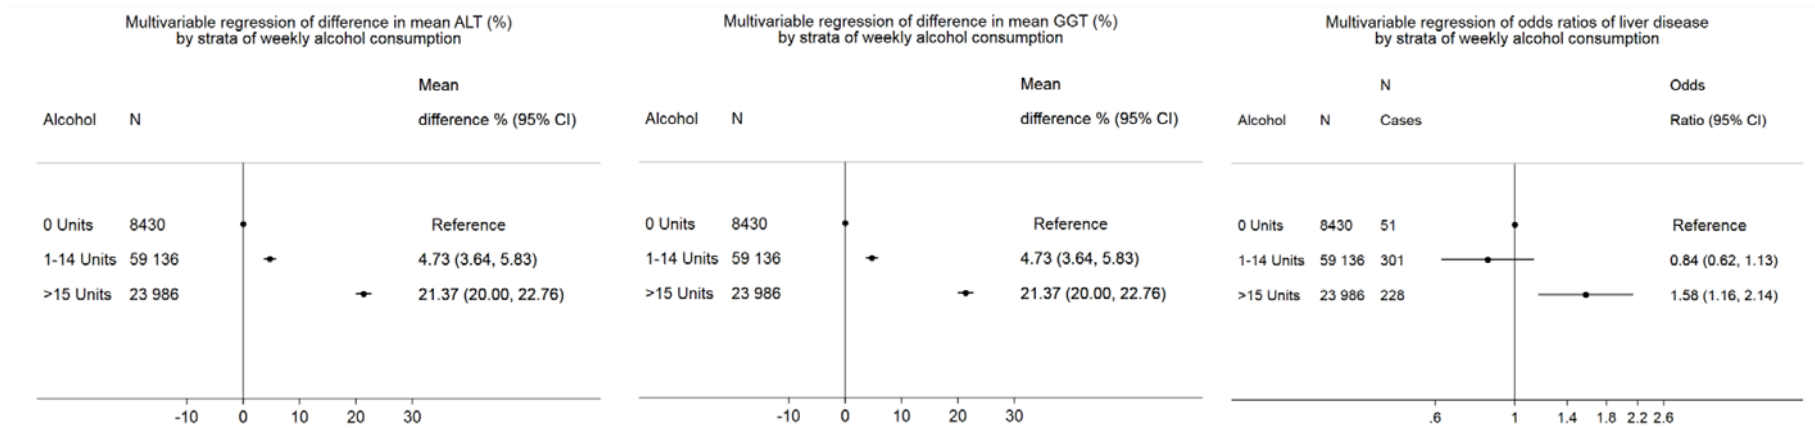

Alcohol as categorical units of alcohol consumed per week, where one unit is equivalent to 12g of alcohol. Models adjusted for age, sex, smoking, education, income and physical activity. CI = confidence interval.



**eFigure 5. Multivariable and Mendelian Randomization Factorial Analysis of the Joint Effects of Body Mass Index (BMI) and Alcohol on Biomarkers of Liver Injury, Including All Individuals With Previously Diagnosed (Prevalent) Liver Disease**

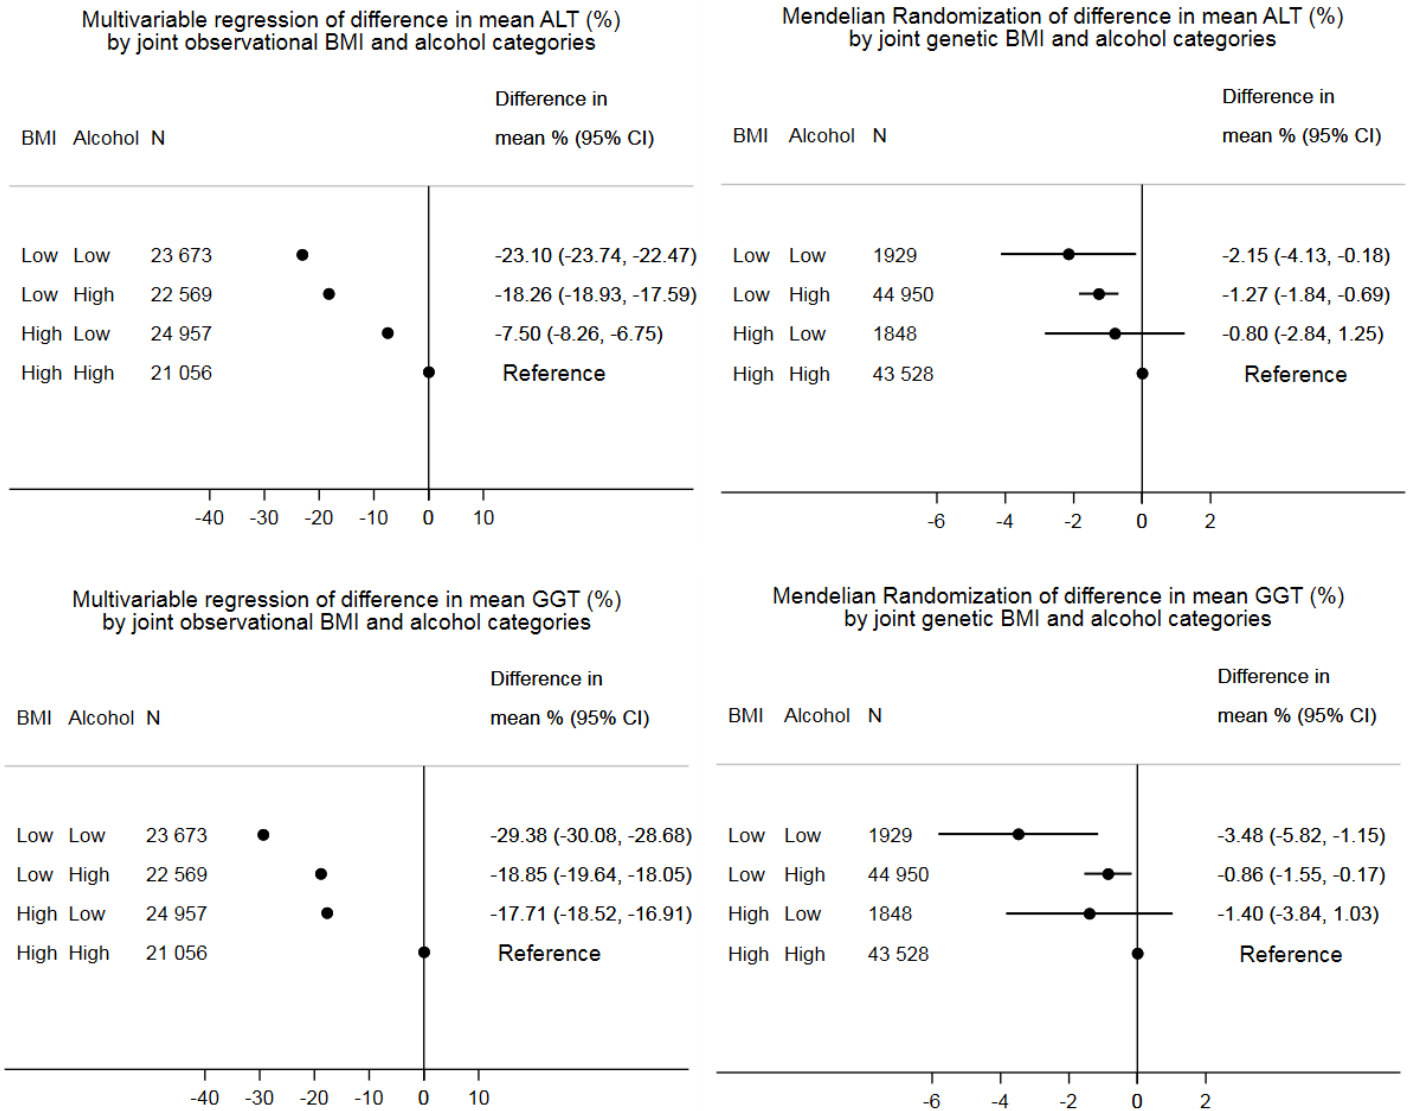

Low vs high BMI = 1.49 km/m<sup>2</sup> difference in MV analyses and 0.51 km/m<sup>2</sup> in MR analyses. Low vs high alcohol = 14.68 units per week difference in MV analyses and 1.78 units per week difference in MR analyses, where one unit of alcohol is equivalent to 12g. MV = Multivariable analysis, adjusted for age, sex, smoking, education, income and physical activity. MR= Mendelian Randomization CI = confidence interval. ALT = Alanine Amino Transferase. GGT =  $\gamma$ -glutamyltransferase

**eFigure 6. Multivariable and Mendelian Randomization Factorial Analysis of the Joint Effects of BMI and Alcohol on Liver Disease, Including All Individuals With Previously Diagnosed (Prevalent) Liver Disease**

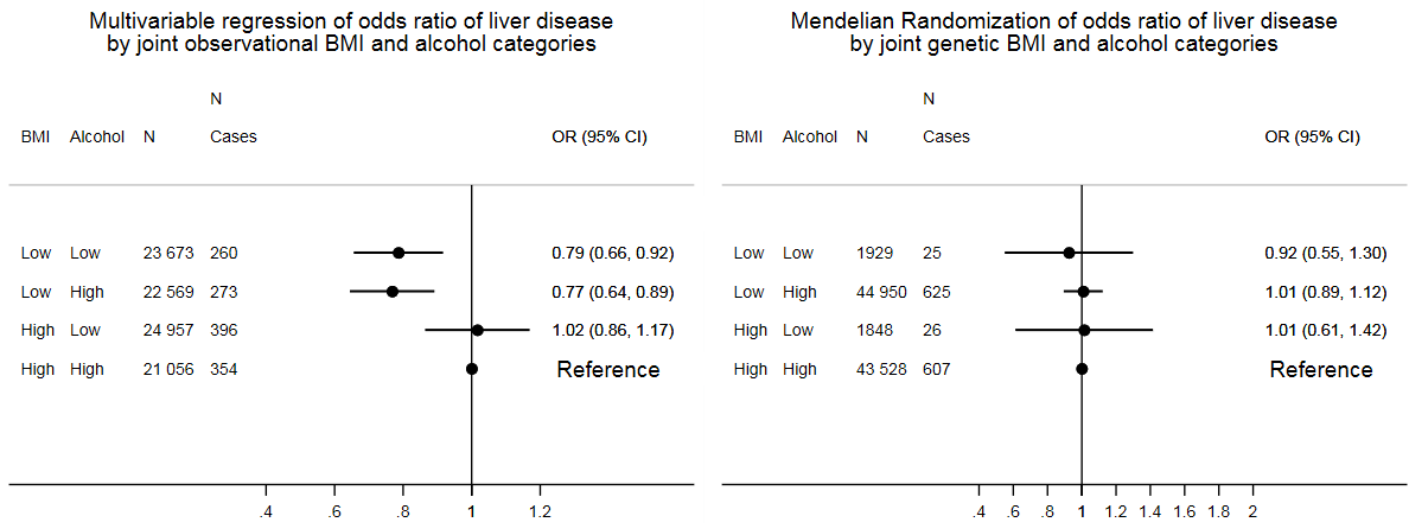

Low vs high BMI = 1.49 km/m<sup>2</sup> difference in MV analyses and 0.51 km/m<sup>2</sup> in MR analyses.  
 Low vs high alcohol = 14.68 units per week difference in MV analyses and 1.78 units per week difference in MR analyses, where one unit of alcohol is equivalent to 12g. MV = Multivariable analysis, adjusted for age, sex, smoking, education, income and physical activity. MR= Mendelian Randomization CI = confidence interval.

**eFigure 7. Multivariable and Mendelian Randomization Analysis of Body Mass Index (BMI) and Liver Injury Biomarkers and Incident Cases of Liver Disease, Stratified by Self-Reported Alcohol Consumption**

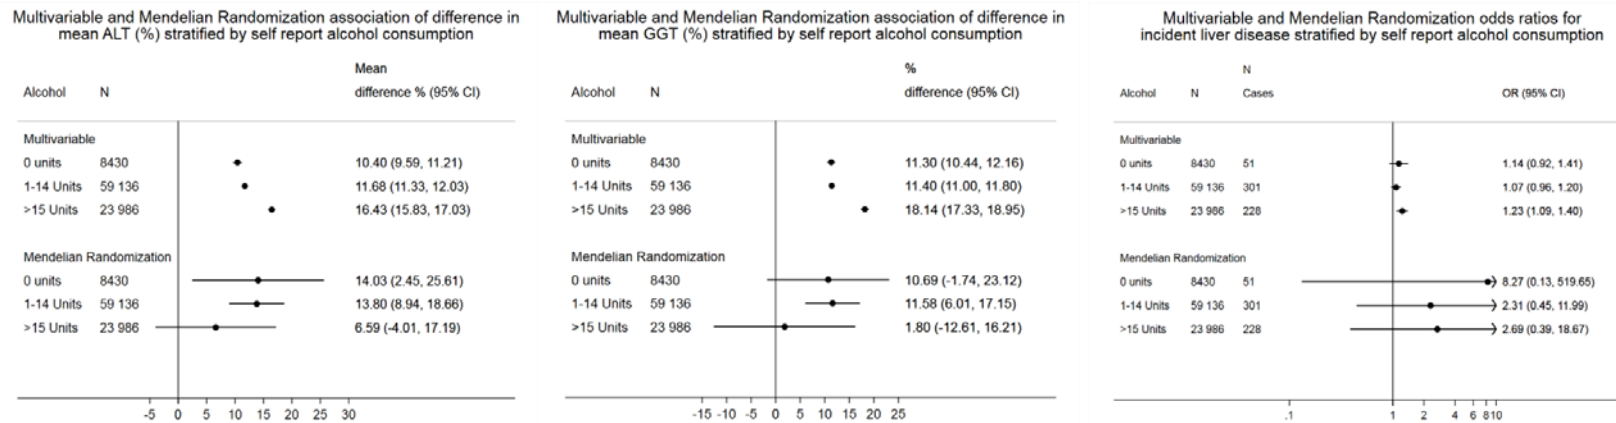

BMI as age and sex standardised units in MV analyses and as a weighted allele score in MR analyses. Alcohol as categorical units of alcohol consumed per week, where one unit is equivalent to 12g of alcohol. MV= Multivariable models adjusted for age, sex, smoking, education, income and physical activity. CI = confidence interval

**eFigure 8. “Leave One Out” Analysis to Assess for Heterogeneity Between BMI Genetic Variants and Liver Injury Biomarkers and Incident Cases of Liver Disease**

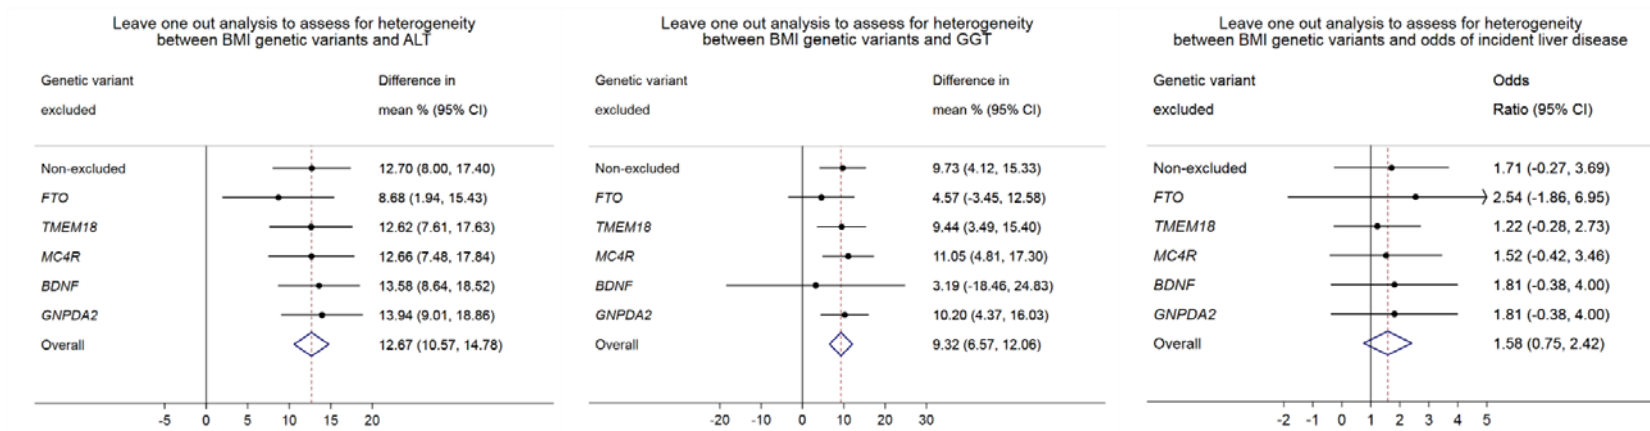

Supplement: jamanetwopen-2-e190305-s001.pdf [file jamanetwopen-2-e190305-s001.pdf]
